# Supplementary material for: The Impact of Obesity on Tumor Glucose Uptake in Breast and Lung Cancer
Source: PubMed Central journal article supplement — JNCI Cancer Spectr. 2020 Feb 12;4(2):pkaa007. doi: 10.1093/jncics/pkaa007 (PMC7190208; doi:10.1093/jncics/pkaa007), 2020-02-12
Supplement: pkaa007_supplementary_data.pdf [file pkaa007_supplementary_data.pdf]

Leitner & Perry Supplement

|                          | Breast Cancer |      |               | HNSCC        |              |                | STS          |              |              | NSCLC        |              |              | All Cancers  |              |             |
|--------------------------|---------------|------|---------------|--------------|--------------|----------------|--------------|--------------|--------------|--------------|--------------|--------------|--------------|--------------|-------------|
|                          | Female        | Male | All           | Female       | Male         | All            | Female       | Male         | All          | Female       | Male         | All          | Female       | Male         | All         |
| Sample Size              | 39            | N/A  | 39            | 7.0          | 34           | 41             | 27           | 24           | 51           | 24           | 33           | 57           | 97           | 91           | 188         |
| Age (yrs)                | N/A           | N/A  | N/A           | 48.6 ± 15.5  | 57.8 ± 7.6   | 56.2 ± 9.8     | 54.4 ± 19.7  | 55.3 ± 13.7  | 54.8 ± 17.0  | N/A          | N/A          | N/A          | N/A          | N/A          | N/A         |
| BMI (kg/m <sup>2</sup> ) | 28.2 ± 5.0    | N/A  | 28.2 ± 5.0    | 30.7 ± 10.4  | 27.7 ± 3.6   | 28.2 ± 5.3     | 27.5 ± 5.0   | 28.5 ± 5.9   | 28.0 ± 5.4   | 25.7 ± 4.4   | 27.4 ± 4.8   | 26.7 ± 4.7   | 27.6 ± 5.5   | 27.8 ± 4.7   | 27.68 ± 5.1 |
| Weight (kg)              | 76.0 ± 14.9   | N/A  | 76.0 ± 14.9*  | 80.8 ± 28.5  | 85.7 ± 12.6  | 84.9 ± 16.0*#^ | 71.7 ± 13.7  | 84.8 ± 19.6  | 77.9 ± 17.8# | 65.9 ± 11.0  | 83.6 ± 16.2  | 76.2 ± 16.7^ | 72.7 ± 15.6  | 84.7 ± 15.8  | 78.5 ± 16.8 |
| Estimated LBM (kg)       | 48.7 ± 4.5    | N/A  | 48.7 ± 4.5*-& | 45.0 ± 8.6   | 62.3 ± 7.1   | 59.3 ± 9.8*#   | 42.6 ± 5.0   | 60.6 ± 9.2   | 51.2 ± 11.6# | 40.4 ± 4.7   | 61.1 ± 7.6   | 52.7 ± 12.0& | 43.2 ± 5.6   | 61.5 ± 7.8   | 52.1 ± 11.4 |
| Estimated Body Fat (%)   | 40.5 ± 4.5    | N/A  | 40.5 ± 4.5*-& | 41.9% ± 8.3% | 26.9% ± 4.2% | 29.5% ± 7.6*   | 39.8% ± 4.5% | 27.1% ± 7.1% | 33.6% ± 8.9~ | 38.1% ± 4.2% | 25.9% ± 5.9% | 30.6% ± 7.9& | 39.5% ± 5.2% | 26.5% ± 5.8% | 33.2% ± 8.5 |

**Supplementary Table 1:** Patient characteristics. A two-way ANOVA with Tukey’s test for multiple comparisons was used to compare variables across each cancer type. Significance is stated as p<0.05 \*Breast Cancer vs. Head and Neck Squamous Cell Carcinoma, #Head and Neck Squamous Cell Carcinoma vs. Soft Tissue Sarcoma, ^ Head and Neck Squamous Cell Carcinoma vs. Non-Small Cell Lung Carcinoma, &Breast Cancer vs. Non-Small Cell Lung Carcinoma, ~Breast Cancer vs. Soft Tissue Sarcoma.

|                      | Breast Cancer |      |           | HNSCC     |            |            | STS        |            |           | NSCLC     |           |           | All Cancers |           |           |
|----------------------|---------------|------|-----------|-----------|------------|------------|------------|------------|-----------|-----------|-----------|-----------|-------------|-----------|-----------|
|                      | Female        | Male | All       | Female    | Male       | All        | Female     | Male       | All       | Female    | Male      | All       | Female      | Male      | All       |
| Tumor SULmax (g/mL)  | 7.3 ± 3.6     | N/A  | 7.3 ± 3.6 | 9.5 ± 4.5 | 10.3 ± 5.7 | 10.1 ± 5.5 | 6.6 ± 3.5* | 9.9 ± 6.1* | 8.1 ± 5.1 | 7.5 ± 4.6 | 8.7 ± 5.1 | 8.2 ± 4.9 | 7.3 ± 3.9   | 9.6 ± 5.6 | 8.4 ± 4.9 |
| Muscle SULmax (g/mL) | 0.6 ± 0.2     | N/A  | 0.6 ± 0.2 | 0.8 ± 0.3 | 0.9 ± 0.2  | 0.9 ± 0.2  | 0.7 ± 0.3  | 0.9 ± 0.3  | 0.8 ± 0.3 | 0.8 ± 0.2 | 0.8 ± 0.2 | 0.8 ± 0.2 | 0.7 ± 0.2   | 0.8 ± 0.2 | 0.8 ± 0.2 |
| WAT SULmax (g/mL)    | 0.3 ± 0.1     | N/A  | 0.3 ± 0.1 | 0.6 ± 0.4 | 0.4 ± 0.2  | 0.5 ± 0.2  | 0.3 ± 0.1  | 0.5 ± 0.2  | 0.4 ± 0.2 | 0.3 ± 0.1 | 0.4 ± 0.2 | 0.3 ± 0.1 | 0.3 ± 0.2   | 0.4 ± 0.2 | 0.4 ± 0.2 |
| BAT SULmax (g/mL)    | 0.6 ± 0.3     | N/A  | 0.6 ± 0.3 | 0.7 ± 0.2 | 0.8 ± 0.3  | 0.8 ± 0.3  | 1.0 ± 0.6  | 0.8 ± 0.2  | 0.9 ± 0.5 | 0.7 ± 0.2 | 0.7 ± 0.2 | 0.7 ± 0.2 | 0.7 ± 0.3   | 0.7 ± 0.3 | 0.7 ± 0.3 |
| Liver SULmax (g/mL)  | 1.6 ± 0.2     | N/A  | 1.6 ± 0.2 | 2.1 ± 0.4 | 2.5 ± 0.4  | 2.4 ± 0.5  | 1.9 ± 0.2  | 2.4 ± 0.4  | 2.0 ± 0.3 | 2.0 ± 0.5 | 2.3 ± 0.6 | 2.1 ± 0.6 | 1.8 ± 0.4   | 2.4 ± 0.5 | 2.1 ± 0.5 |
| Spleen SULmax (g/mL) | 1.3 ± 0.3     | N/A  | 1.3 ± 0.3 | 1.8 ± 0.3 | 2.1 ± 0.4  | 2.1 ± 0.4  | 1.7 ± 0.4  | 1.8 ± 0.2  | 1.7 ± 0.3 | 1.6 ± 0.4 | 1.9 ± 0.3 | 1.8 ± 0.3 | 1.5 ± 0.3   | 2.0 ± 0.4 | 1.8 ± 0.4 |

**Supplementary Table 2:** Whole-Body lean body mass-corrected maximal standardized uptake value (SULmax) across cancer types in men and women. A two-way ANOVA with Tukey’s test for multiple comparisons was used to compare variables between women and men across cancer types. Significance is stated as p<0.05. \*Soft Tissue Sarcoma Women vs. Soft Tissue Sarcoma Men.
